# Supplementary material
Source: PubMed Central journal article supplement (PMC5783298)

Figure S1

A

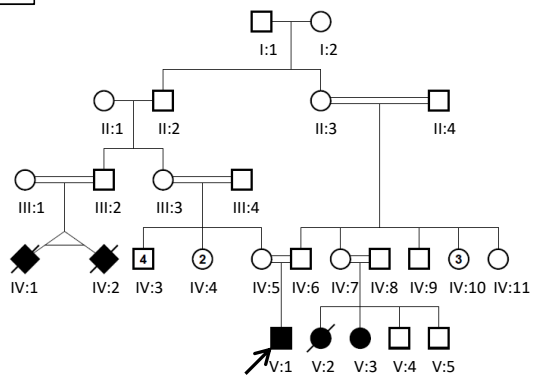

16DG0226

C

Affected

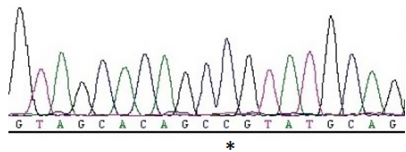

NC

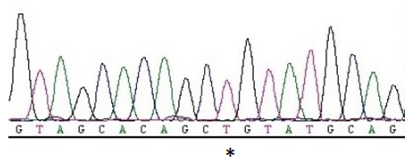

Unaff  
Parent

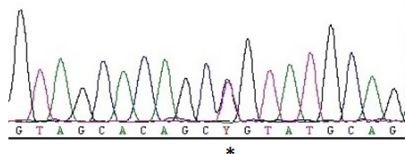

*CYP51A1*:NM\_000786:c.695T>C:p.L232P

B

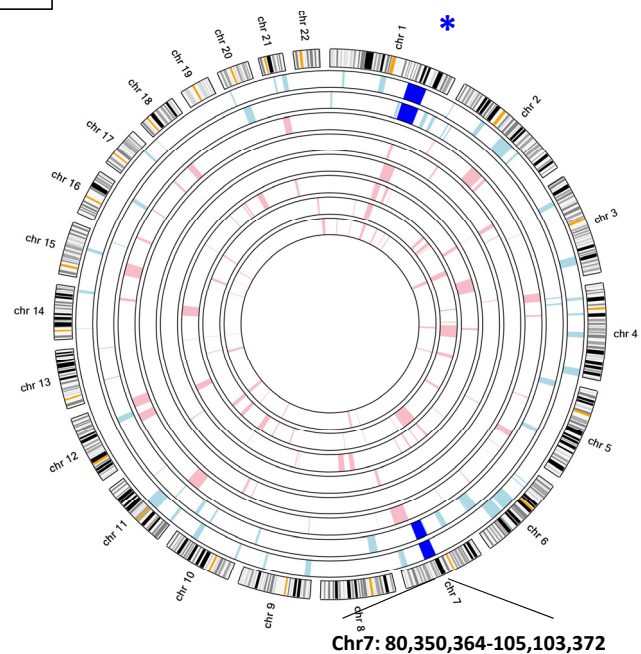

Figure S2

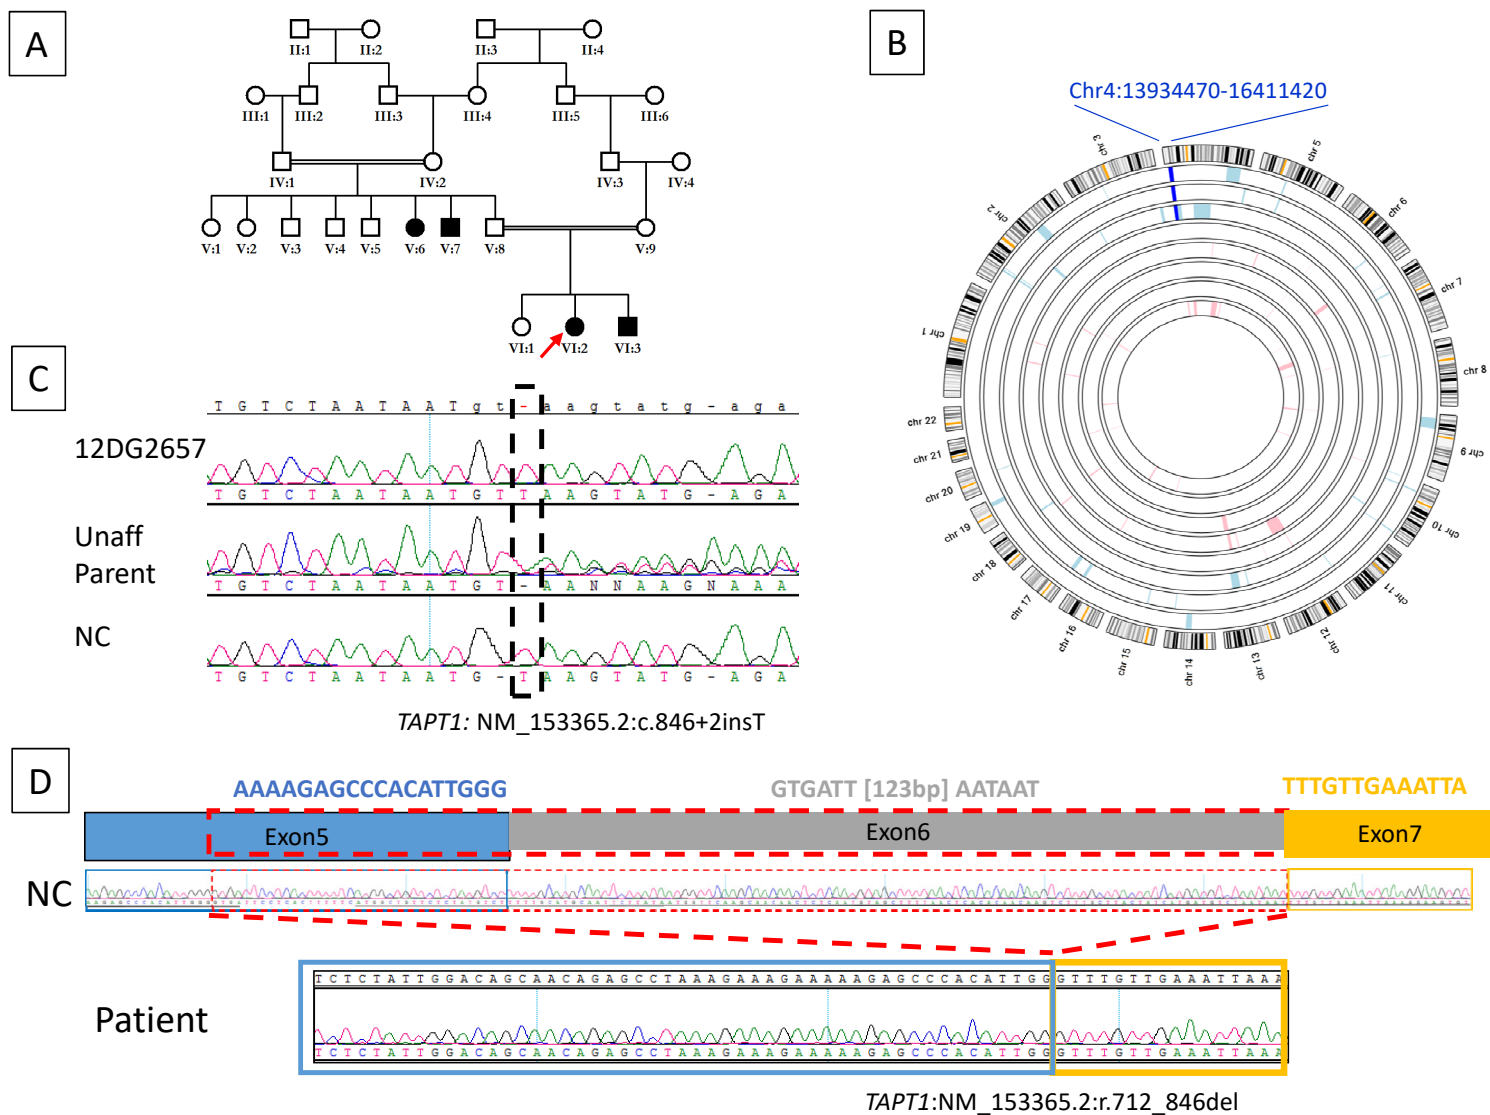

Figure S3

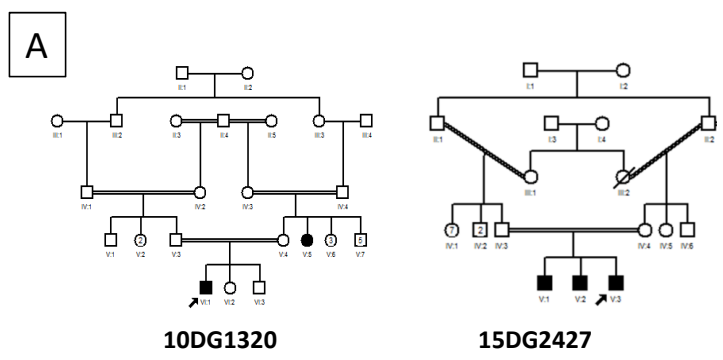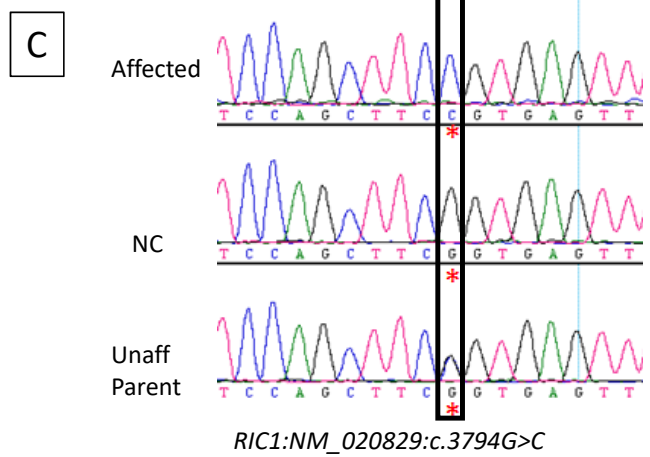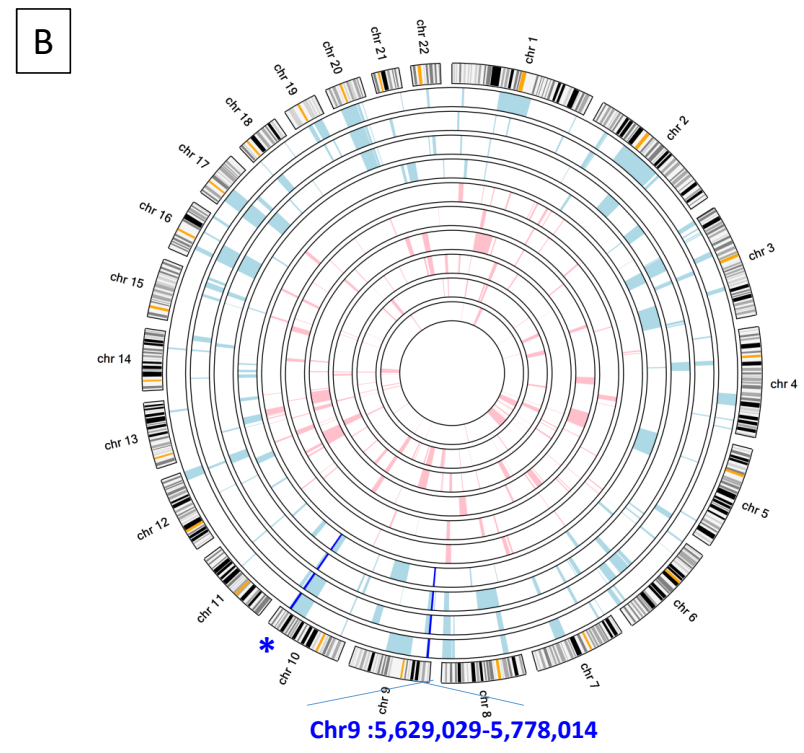

Figure S4

A

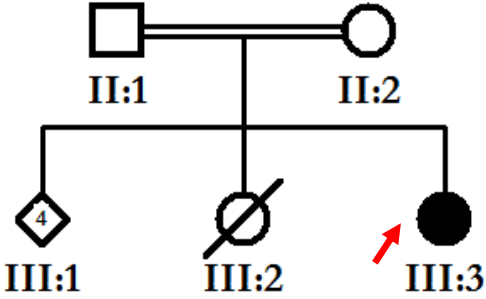

B

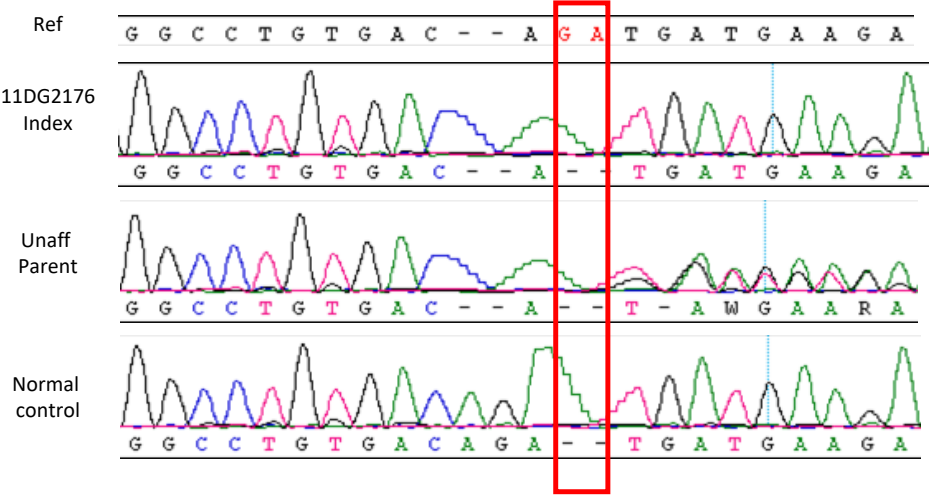

TAF1A: NM\_001201536.1:c.40\_41del;p.(Asp14\*)

Figure S5

A

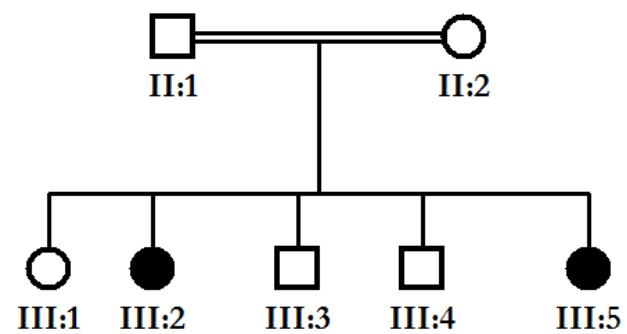

B

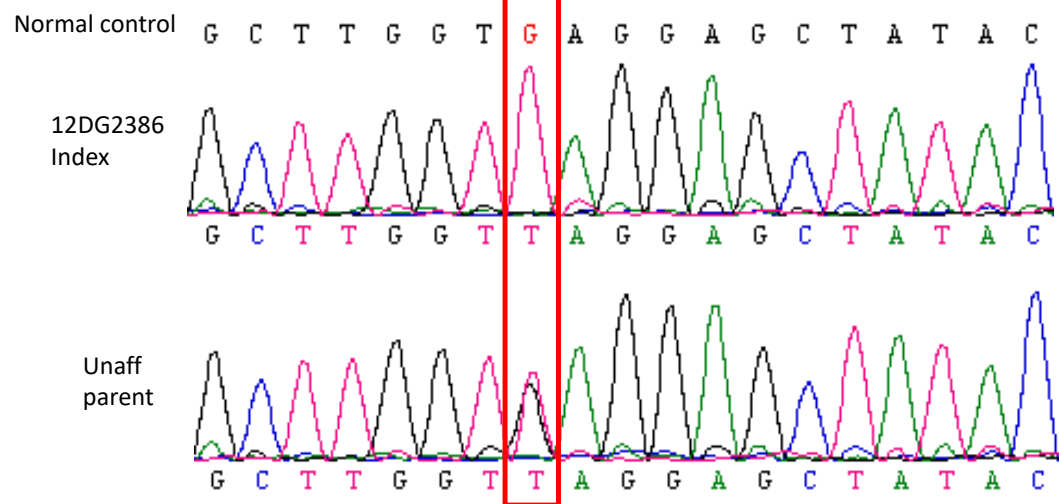

*WDR87*: NM\_031951.4:c.856G>T;p.(Glu286\*)

Figure S6

A. *TAPT1* network with *iSyTE* E10.5 expression overlay

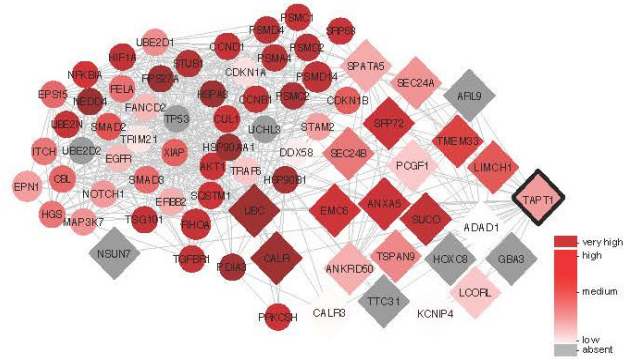

B. *TAPT1* network with *iSyTE* E10.5 enrichment overlay

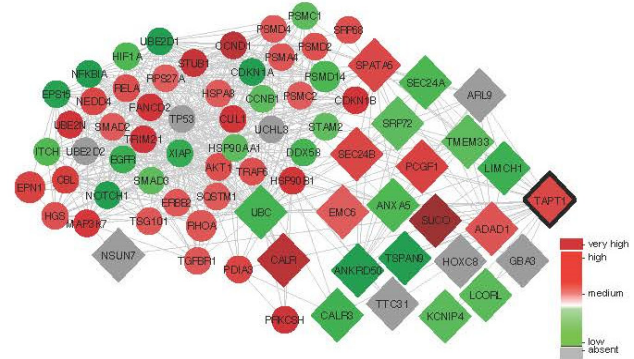

C. *KIAA1432* network with *iSyTE* E10.5 expression overlay

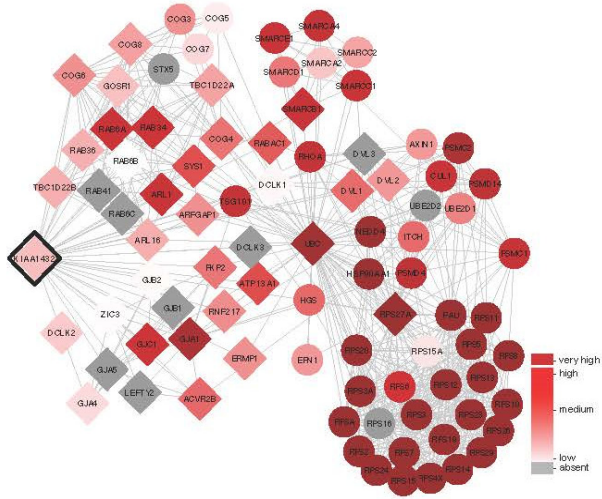

D. *KIAA1432* network with *iSyTE* E10.5 enrichment overlay

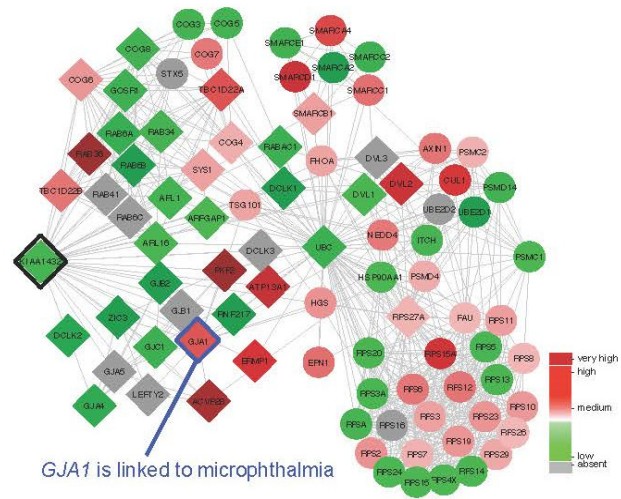

Figure S7

A. *GEMIN4* network with *iSyTE* E10.5 expression overlay

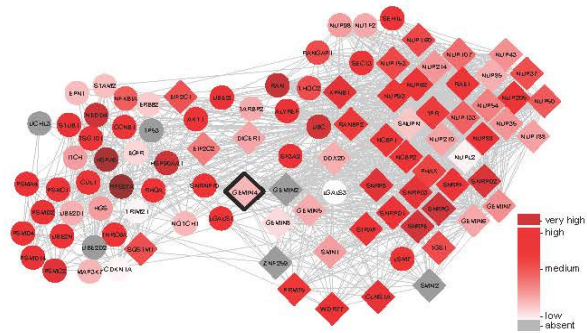

B. *GEMIN4* network with *iSyTE* E10.5 enrichment overlay

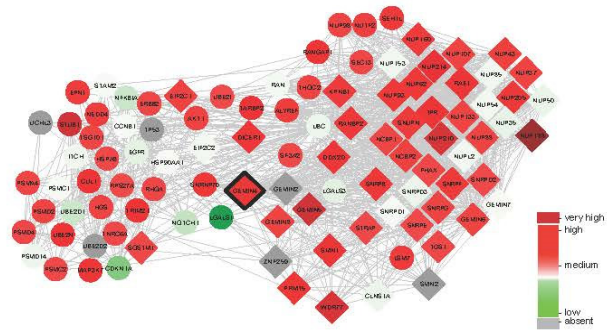

C. *CYP51A1* network with *iSyTE* E10.5 expression overlay

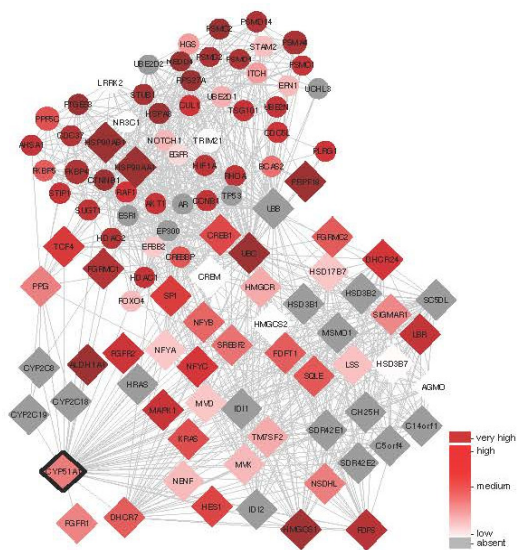

D. *CYP51A1* network with *iSyTE* E10.5 enrichment overlay

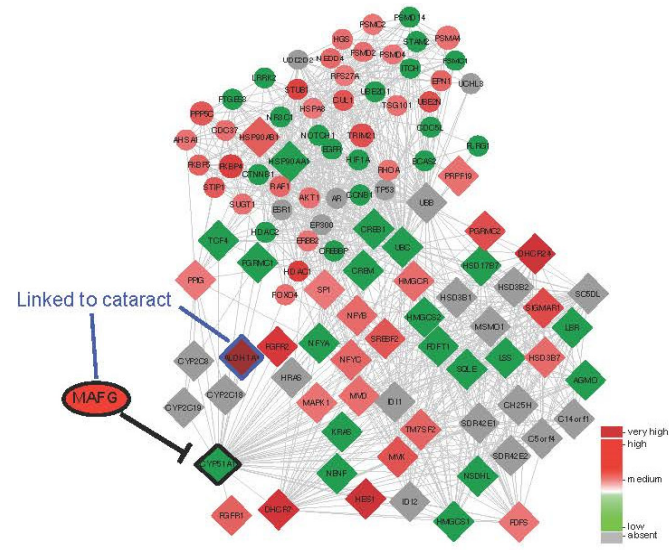

Supplement: NIHMS933575-supplement-1.pdf [file NIHMS933575-supplement-1.pdf]
